# Supplementary material for: Controlling the regioselectivity and stereospecificity of FAD-dependent polyamine oxidases with the use of amine-attached guide molecules as conformational modulators
Source: Oxford University Press journal article supplement (doi:10.1042/bsr20180527), 2018-07-13
Supplement: bsr20180527_supp1.pdf [file bsr20180527_supp1.pdf]

## Supplementary Material 1

### Controlling the regioselectivity and stereospecificity of FAD-dependent polyamine oxidases with the use of amine-attached guide molecules as conformational modulators

Tuomo A. Keinänen<sup>\*1</sup>, Nikolay Grigorenko<sup>‡</sup>, Alex R. Khomutov<sup>§</sup>, Qingqiu Huang<sup>†</sup>, Anne Uimari<sup>1</sup>, Leena Alhonen<sup>\*</sup>, Mervi T. Hyvönen<sup>\*</sup> and Jouko Vepsäläinen<sup>\*</sup>

<sup>\*</sup>*School of Pharmacy, Biocenter Kuopio, University of Eastern Finland, Kuopio Campus, P.O. Box 1627 Kuopio, FI-70211 Finland.* <sup>1</sup>*Natural Resources Institute Finland, Neulaniementie 5, FI-70210 Kuopio, Finland.* <sup>†</sup>*MacCHESS at the Cornell High Energy Synchrotron Source, Cornell University Ithaca, NY 14853-8001, USA.* <sup>‡</sup>*BASF Schweiz AG, P.O. Box, CH 4002, Basel, Switzerland.* <sup>§</sup>*Engelhardt Institute of Molecular Biology, Russian Academy of Sciences, Vavilov St 32, 119991 Moscow, Russia.*

<sup>1</sup> Corresponding author Tuomo.Keinanen@uef.fi

#### Abbreviations:

Fms1, yeast polyamine oxidase; MeSpd, 1-methylspermidine (1,8-diamino-5-azanonane); Me<sub>2</sub>Spm, 1,12-dimethylspermine (2,13-Diamino-5,10-diazatetradecane); *N*<sup>1</sup>-Ac-MeSpd, *N*<sup>8</sup>-Acetyl-1,8-diamino-5-azanonane.

#### Supplementary Table 1. *N*<sup>1</sup>-AcSpd and *N*<sup>1</sup>-Acetylated MeSpd as substrates of Fms1.

The reactions were carried out in triplicate at pH 9.0 in 100 mM Glycine-NaOH at +25°C. Kinetic values for *N*<sup>1</sup>-Ac-MeSpd enantiomers were determined by using substrate concentrations of 25, 50, 100, 200, 400, 600 and 1000 μM. Recombinant Fms1 was 1.8 μg/reaction and the incubation times for Rac-MeSpd 30 min, (*R*)-MeSpd 20 min and (*S*)-MeSpd 40 minutes. Linearity of reaction was monitored by using T<sub>1/2</sub> controls, i.e. samples that have been incubated for 15, 10 and 20 min, respectively (half of the reaction time of an ordinary sample). Put formation was monitored by using HPLC. *k*<sub>cat</sub> values have been calculated assuming *M*<sub>r</sub> of 58,833 for monomer with one catalytically active centre.

| Polyamine                                    | <i>K</i> <sub>m</sub> (μM) | <i>V</i> <sub>max</sub> (nmol/min/mg) | <i>k</i> <sub>cat</sub> s <sup>-1</sup> | <i>k</i> <sub>cat</sub> / <i>K</i> <sub>m</sub> M <sup>-1</sup> s <sup>-1</sup> |
|----------------------------------------------|----------------------------|---------------------------------------|-----------------------------------------|---------------------------------------------------------------------------------|
| <i>N</i> <sup>1</sup> -AcSpd                 | 42 ± 8                     | 66,600 ± 2,300                        | 65 ± 2                                  | (1.56 ± 0.30) × 10 <sup>6</sup>                                                 |
| <i>N</i> <sup>1</sup> -Ac-MeSpd              | 140 ± 23                   | 50 ± 3                                | 0.05 ± 0.00                             | 357 ± 61                                                                        |
| <i>N</i> <sup>1</sup> -Ac-( <i>R</i> )-MeSpd | 155 ± 29                   | 61 ± 4                                | 0.06 ± 0.00                             | 387 ± 76                                                                        |
| <i>N</i> <sup>1</sup> -Ac-( <i>S</i> )-MeSpd | 109 ± 18                   | 22 ± 1                                | 0.02 ± 0.00                             | 183 ± 32                                                                        |

### Supplementary Table 2 Enantiomers of MeSpd as substrates of Fms1.

The reactions were carried out in triplicate at pH 9.0 in 100 mM Glycine-NaOH at +25°C. Kinetic values for MeSpd enantiomers were determined by using substrate concentrations of 100, 300, 600, 1000, 2000 and 4000  $\mu\text{M}$ . Recombinant Fms1 was 3.8  $\mu\text{g}$ /reaction and the incubation time 60 minutes. Linearity of reaction was monitored by using  $T_{1/2}$  controls, i.e. samples that have been incubated for 30 min (half of the reaction time of an ordinary sample).  $E_1$  cleavage was monitored by HPLC by measuring Put formation and  $E_2$  cleavage by determining butane-1,3-diamine content.  $k_{\text{cat}}$  values have been calculated assuming  $M_r$  of 58,833 for monomer with one catalytically active centre.

| 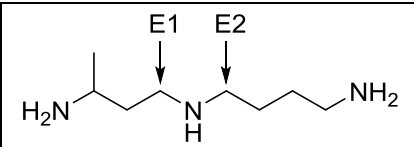 | <b><math>E_1</math> cleavage kinetic values</b> |                                  |                      | <b><math>E_2</math> cleavage kinetic values</b> |                                  |                      |
|-----------------------------------------------------------------------------------|-------------------------------------------------|----------------------------------|----------------------|-------------------------------------------------|----------------------------------|----------------------|
|                                                                                   | $K_m$ ( $\mu\text{M}$ )                         | $k_{\text{cat}}$ $\text{s}^{-1}$ | $k_{\text{cat}}/K_m$ | $K_m$ ( $\mu\text{M}$ )                         | $k_{\text{cat}}$ $\text{s}^{-1}$ | $k_{\text{cat}}/K_m$ |
| ( <i>R</i> )-MeSpd                                                                | 502 $\pm$ 31                                    | 0.014 $\pm$ 0                    | 28 $\pm$ 2           | 467 $\pm$ 87                                    | 0.006 $\pm$ 0                    | 13 $\pm$ 3           |
| ( <i>S</i> )-MeSpd                                                                | 555 $\pm$ 33                                    | 0.011 $\pm$ 0                    | 20 $\pm$ 1           | 606 $\pm$ 99                                    | 0.013 $\pm$ 0                    | 22 $\pm$ 4           |

**Supplementary Table 3 The effects of increasing aromatic aldehyde concentration for the regioselectivity of Fms1 using (*R*)-MeSpd or (*S*)-MeSpd as a substrate.**

The reactions were carried out in triplicate at pH 9.0 in 100 mM Glycine-NaOH at +25°C with the fixed 1 or 4 mM MeSpd supplemented with increasing concentration 50 or 500  $\mu$ M of tested aldehyde. Recombinant Fms1 was 1.6  $\mu$ g/reaction and the incubation time from 15 to 30 minutes. Linearity of reaction was monitored by using  $T_{1/2}$  controls, i.e. samples that have been incubated for 7.5 to 15 min (half of the reaction time of an ordinary sample). E<sub>1</sub> cleavage was monitored by HPLC by measuring Put formation and E<sub>2</sub> cleavage by determining butane-1,3-diamine content.

| Substrate                                                                                  |            | <i>(R)</i> -MeSpd   |                     | <i>(S)</i> -MeSpd   |                     |
|--------------------------------------------------------------------------------------------|------------|---------------------|---------------------|---------------------|---------------------|
| 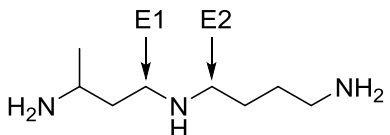          |            | E1<br>(nmol/mg/min) | E2<br>(nmol/mg/min) | E1<br>(nmol/mg/min) | E2<br>(nmol/mg/min) |
| Without aldehyde 1 mM                                                                      |            | 9.5 ± 0.1           | 4.3 ± 0.9           | 7.2 ± 0.2           | 7.9 ± 1.1           |
| Without aldehyde 4 mM                                                                      |            | <b>12.5 ± 0.0</b>   | <b>5.6 ± 0.4</b>    | <b>9.6 ± 0.1</b>    | <b>11.1 ± 1.8</b>   |
| aldehyde                                                                                   | ( $\mu$ M) |                     |                     |                     |                     |
| <br>A12  | 50         | 10.5 ± 1.1          | 33.7 ± 4.8          | 29 ± 1.0            | 20.2 ± 1.0          |
|                                                                                            | <b>50</b>  | 14.0 ± 0.9          | 31.8 ± 4.3          | 31 ± 1.8            | 23.3 ± 2.0          |
|                                                                                            | 500        | 12.7 ± 1.6          | 186 ± 24            | 57 ± 1.1            | 36 ± 4.2            |
|                                                                                            | <b>500</b> | 14.4 ± 0.8          | 216 ± 31            | 62 ± 3              | 41 ± 2.5            |
| <br>A13 | 50         | 19.1 ± 1.0          | 10.3 ± 3.1          | 45.6 ± 2.6          | 8.6 ± 1.8           |
|                                                                                            | <b>50</b>  | 19.1 ± 0.4          | 9.6 ± 2.2           | 44.0 ± 1.2          | 10.0 ± 0.6          |
|                                                                                            | 500        | 72.8 ± 2.3          | 41.5 ± 3.4          | 66.1 ± 0.0          | 6.9 ± 0.7           |
|                                                                                            | <b>500</b> | 63.1 ± 1.0          | 39.5 ± 2.1          | 73.5 ± 0.4          | 7.4 ± 1.3           |

Supplementary Figure 1

**Catalytic velocities of Fms1 with 1 mM Spm as a substrate in 170 mM Bis-Tris buffer at different pH**

200 mM (170 mM in the final reaction mixtures) Bis-Tris propane buffer was prepared at pH 7.4; 8.0; 8.5; 8.8; 9.0; 9.2 and 9.5. Fms1 0.1  $\mu\text{g}$ /reaction mixture was supplemented with 1 mM Spm at various pH  $V_{\text{tot}}$  180  $\mu\text{l}$ . Reaction mixtures were incubated at 25  $^{\circ}\text{C}$  water bath for four minutes until 20  $\mu\text{l}$  of 50 % w/v SSA containing 100  $\mu\text{M}$  DAH was added and vortexed briefly and placed on ice. HPLC was used to analyse Spd content of samples as described in Experimental Procedures. Values are averages of triplicate determinations expressed as  $\mu\text{mol}/\text{min} \pm \text{SD}$  (error bars).

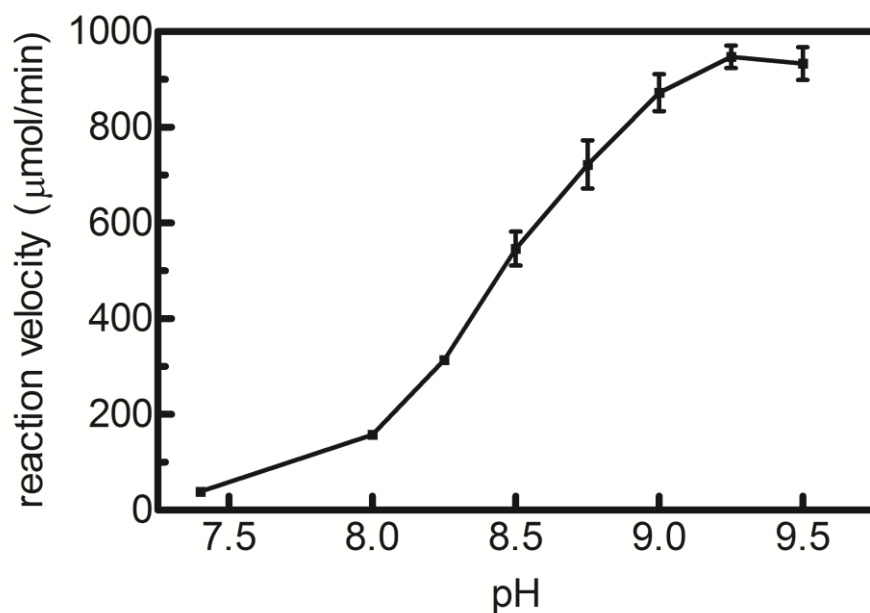

## Supplementary Material 2

### Controlling the regioselectivity and stereospecificity of FAD-dependent polyamine oxidases with the use of amine-attached guide molecules as conformational modulators

Tuomo A. Keinänen<sup>\*1</sup>, Nikolay Grigorenko<sup>‡</sup>, Alex R. Khomutov<sup>§</sup>, Qingqiu Huang<sup>†</sup>, Anne Uimari<sup>1</sup>, Leena Alhonen<sup>\*</sup>, Mervi T. Hyvönen<sup>\*</sup> and Jouko Vepsäläinen<sup>\*</sup>

<sup>\*</sup>*School of Pharmacy, Biocenter Kuopio, University of Eastern Finland, Kuopio Campus, P.O. Box 1627 Kuopio, FI-70211 Finland.* <sup>1</sup>*Natural Resources Institute Finland, Neulaniementie 5, FI-70210 Kuopio, Finland.* <sup>†</sup>*MacCHESS at the Cornell High Energy Synchrotron Source, Cornell University Ithaca, NY 14853-8001, USA.* <sup>‡</sup>*BASF Schweiz AG, P.O. Box, CH 4002, Basel, Switzerland.* <sup>§</sup>*Engelhardt Institute of Molecular Biology, Russian Academy of Sciences, Vavilov St 32, 119991 Moscow, Russia.*

<sup>1</sup> Corresponding author Tuomo.Keinanen@uef.fi

#### Michaelis-Menten Graphs and Data of Table 1

| GraphPad Prism 5.03      | N <sup>1</sup> AcSpd | Bn-R-MeSpd       | Bn-S-MeSpd         | Bz-R-MeSpd     | Bz-S-MeSpd         | P4-R-MeSpd     | P4-S-MeSpd         |
|--------------------------|----------------------|------------------|--------------------|----------------|--------------------|----------------|--------------------|
|                          | μmol/min/mg          | μmol/min/mg      | μmol/min/mg        | μmol/min/mg    | μmol/min/mg        | μmol/min/mg    | μmol/min/mg        |
| Michaelis-Menten         |                      |                  |                    |                |                    |                |                    |
| Best-fit values          |                      |                  |                    |                |                    |                |                    |
| V <sub>max</sub>         | 2.969                | 0.1534           | 0.0307             | 5.017          | 0.02985            | 5.593          | 0.01522            |
| K <sub>m</sub>           | 8.218                | 2.039            | 1.639              | 1.214          | 0.2098             | 3.645          | 0.839              |
| Std. Error               |                      |                  |                    |                |                    |                |                    |
| V <sub>max</sub>         | 0.02437              | 0.001549         | 0.001783           | 0.5122         | 0.000935           | 0.2399         | 0.0003134          |
| K <sub>m</sub>           | 0.3908               | 0.109            | 0.591              | 0.7426         | 0.161              | 0.5973         | 0.1498             |
| 95% Confidence Intervals |                      |                  |                    |                |                    |                |                    |
| V <sub>max</sub>         | 2.901 to 3.037       | 0.1467 to 0.1600 | 0.02303 to 0.03838 | 3.387 to 6.647 | 0.02687 to 0.03282 | 4.928 to 6.259 | 0.01435 to 0.01609 |
| K <sub>m</sub>           | 7.133 to 9.303       | 1.570 to 2.508   | 0.0 to 4.182       | 0.0 to 3.577   | 0.0 to 0.7221      | 1.987 to 5.303 | 0.4233 to 1.255    |
| Goodness of Fit          |                      |                  |                    |                |                    |                |                    |
| Degrees of Freedom       | 4                    | 2                | 2                  | 3              | 3                  | 4              | 4                  |
| R square                 | 0.9962               | 0.9962           | 0.8491             | 0.6415         | 0.385              | 0.9614         | 0.9165             |
| Absolute Sum of Squares  | 0.003966             | 0.000002157      | 0.000003144        | 0.7509         | 0.000003943        | 0.2719         | 0.000007842        |
| Sy.x                     | 0.03149              | 0.001038         | 0.001254           | 0.5003         | 0.001146           | 0.2607         | 0.0004428          |
| Constraints              |                      |                  |                    |                |                    |                |                    |
| K <sub>m</sub>           | Km > 0.0             | Km > 0.0         | Km > 0.0           | Km > 0.0       | Km > 0.0           | Km > 0.0       | Km > 0.0           |
| Number of points         |                      |                  |                    |                |                    |                |                    |
| Analyzed                 | 6                    | 4                | 4                  | 5              | 5                  | 6              | 6                  |

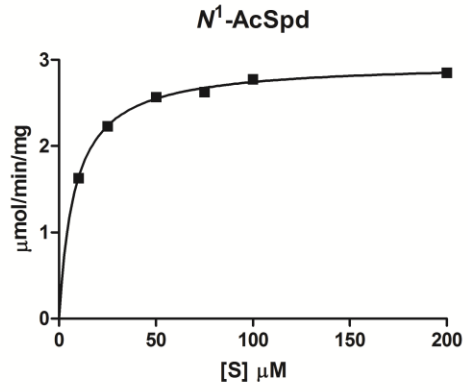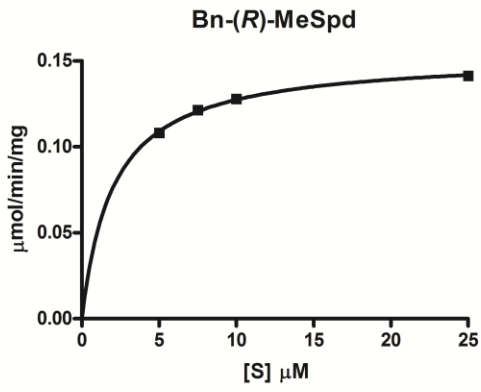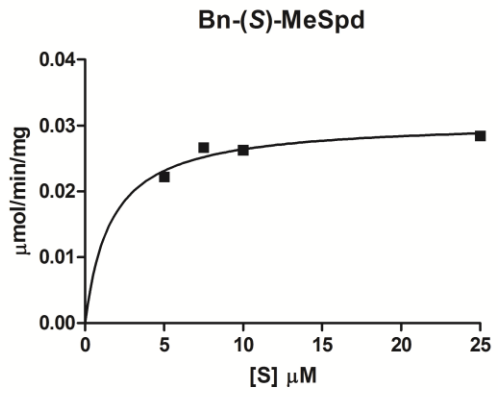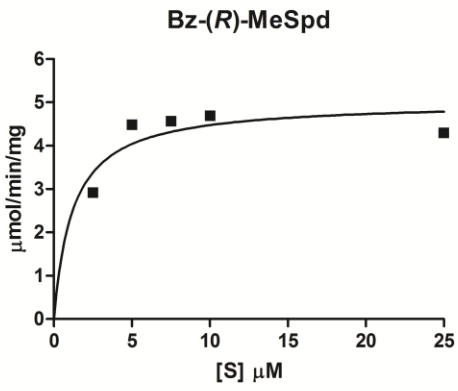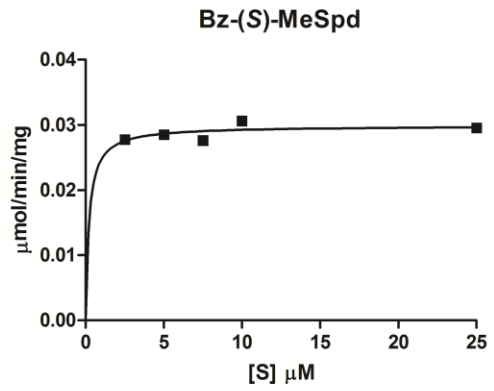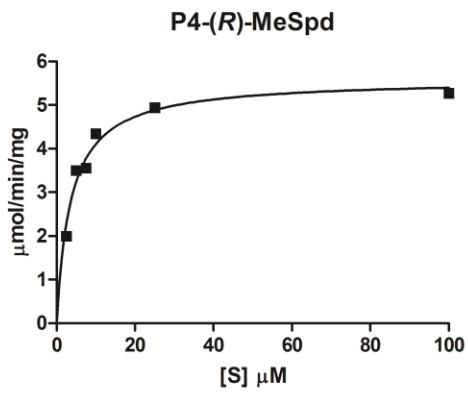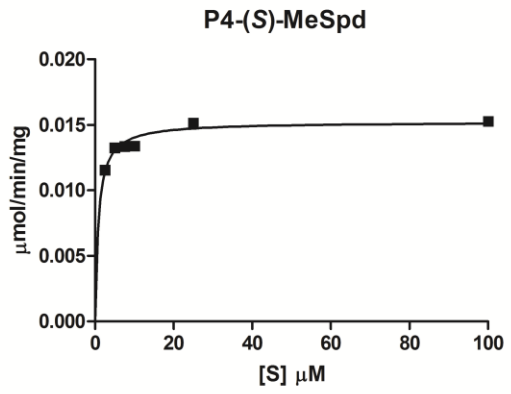

## Michaelis-Menten Graphs and Data of Table 3

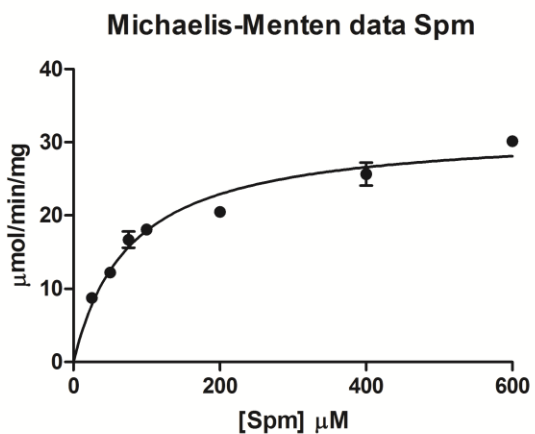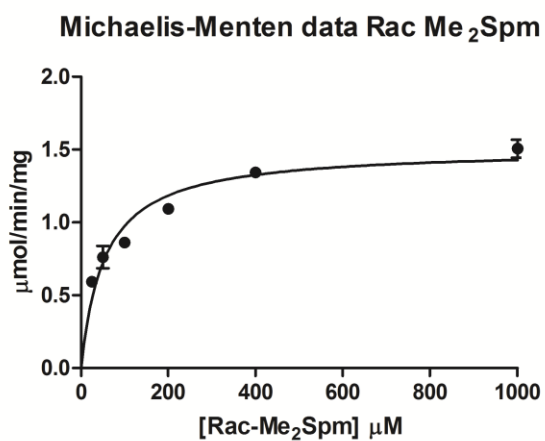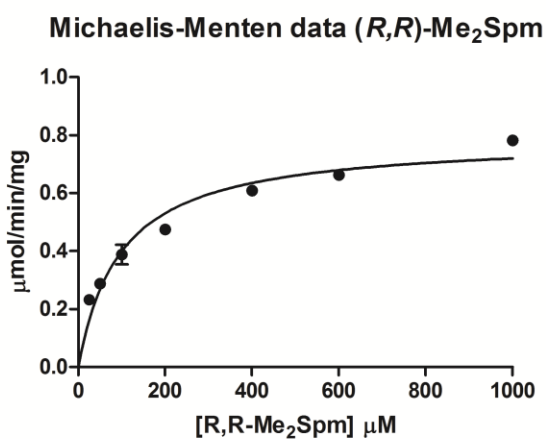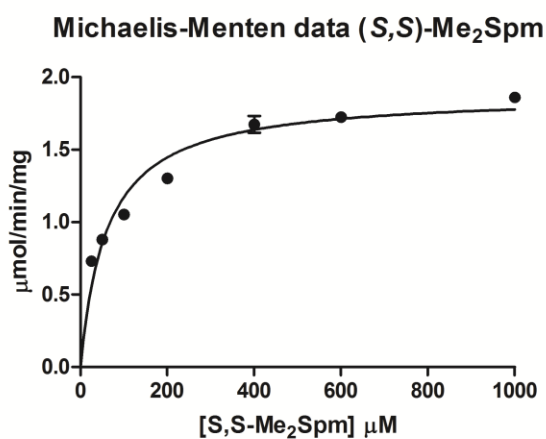

| GraphPad Prism 5.03      | Spm            | Rac-Me <sub>2</sub> Spm | (R,R)-Me <sub>2</sub> Spm | (S,S)-Me <sub>2</sub> Spm |
|--------------------------|----------------|-------------------------|---------------------------|---------------------------|
|                          | μmol/min/mg    | μmol/min/mg             | μmol/min/mg               | μmol/min/mg               |
| Michaelis-Menten         |                |                         |                           |                           |
| Best-fit values          |                |                         |                           |                           |
| V <sub>max</sub>         | 31.71          | 1.506                   | 0.7903                    | 1.886                     |
| K <sub>m</sub>           | 76.85          | 54.4                    | 97.9                      | 60.81                     |
| Std. Error               |                |                         |                           |                           |
| V <sub>max</sub>         | 1.030          | 0.05122                 | 0.02751                   | 0.05232                   |
| K <sub>m</sub>           | 7.842          | 7.168                   | 12.37                     | 7.038                     |
| 95% Confidence Intervals |                |                         |                           |                           |
| V <sub>max</sub>         | 29.55 to 33.86 | 1.397 to 1.614          | 0.7327 to 0.8479          | 1.777 to 1.996            |
| K <sub>m</sub>           | 60.43 to 93.26 | 39.20 to 69.60          | 72.02 to 123.8            | 46.08 to 75.54            |
| Goodness of Fit          |                |                         |                           |                           |
| Degrees of Freedom       | 19             | 16                      | 19                        | 19                        |
| R square                 | 0.9511         | 0.9181                  | 0.9392                    | 0.9321                    |
| Absolute Sum of Squares  | 48.65          | 0.1543                  | 0.04538                   | 0.2437                    |
| Sy.x                     | 1.600          | 0.09819                 | 0.04887                   | 0.1133                    |
| Constraints              |                |                         |                           |                           |
| K <sub>m</sub>           | Km > 0.0       | Km > 0.0                | Km > 0.0                  | Km > 0.0                  |
| Number of points         |                |                         |                           |                           |
| Analyzed                 | 21             | 18                      | 21                        | 21                        |

Michaelis-Menten Graphs and Data of Table 4 ( $N^1$ -AcSpd data shown in Supplementary 1 Table1)

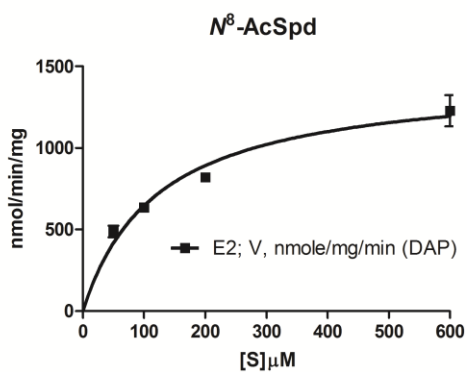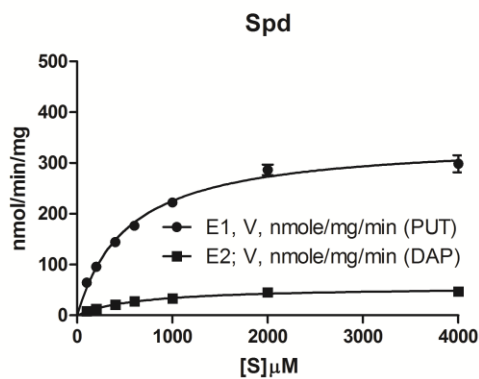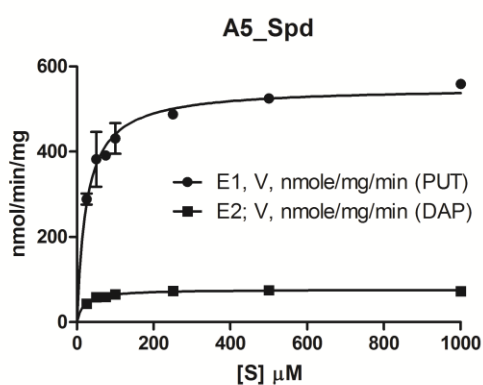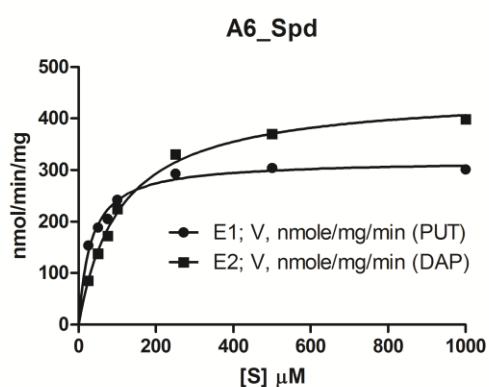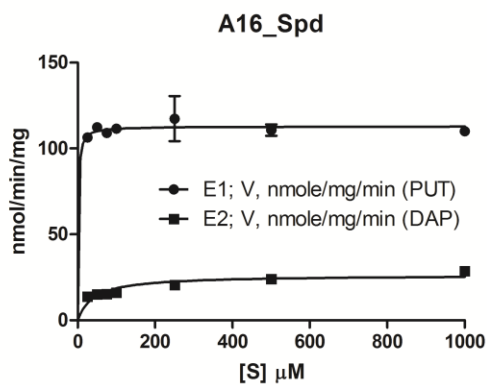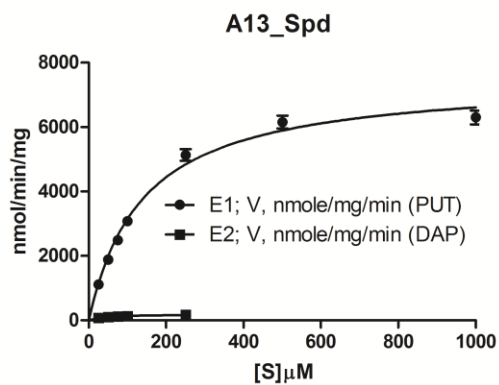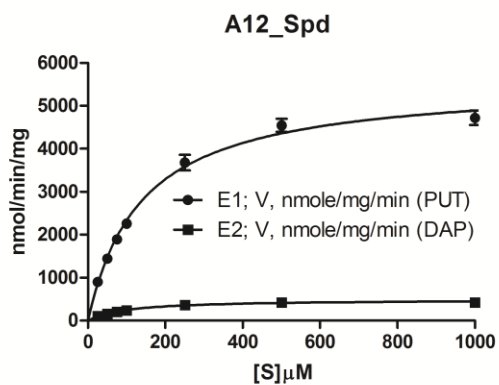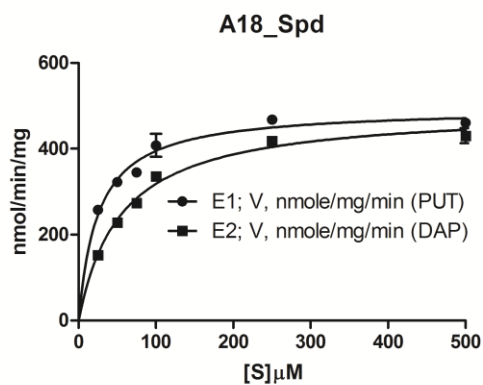



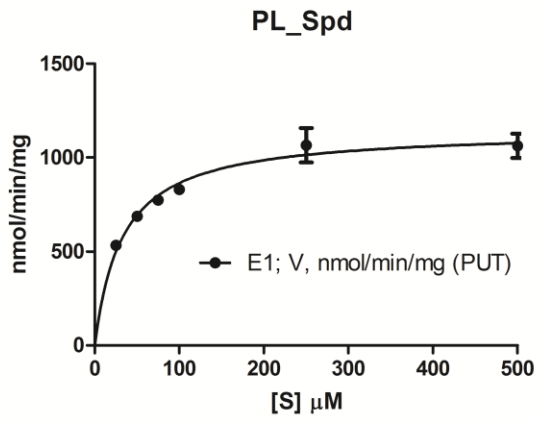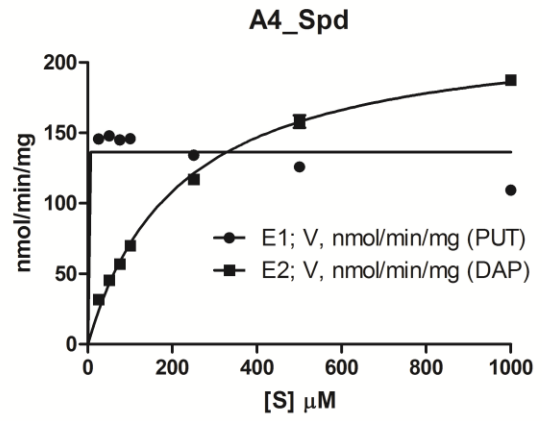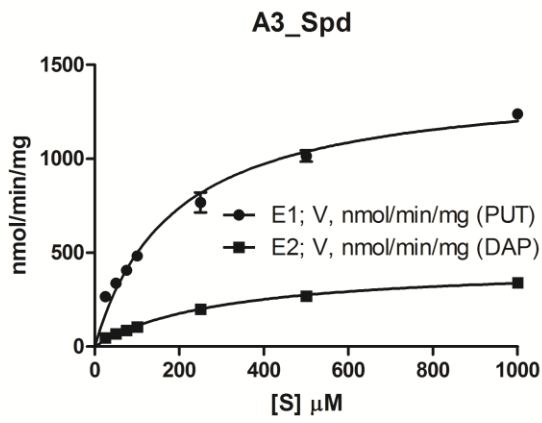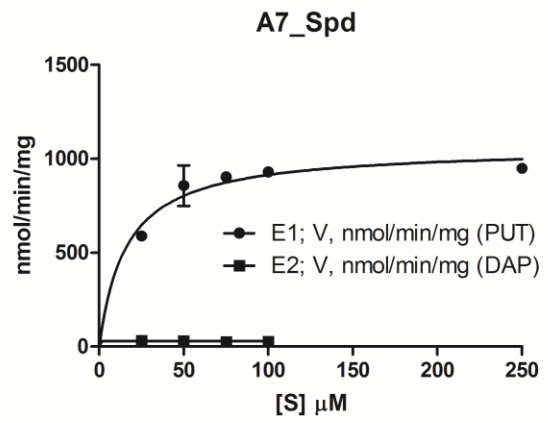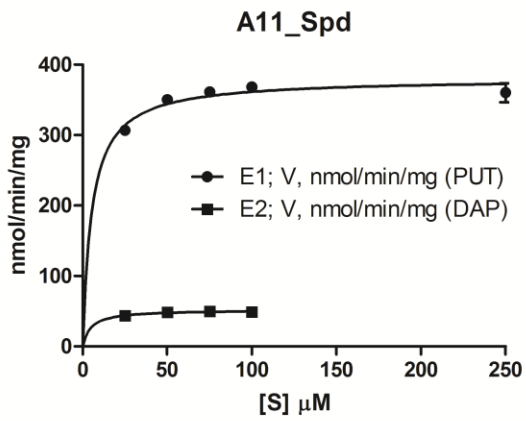

| GraphPad Prism 5.03      | N <sup>8</sup> AcSpd | Spd E1         | Spd E2         | A5_Spd E1      | A5_Spd E2      | A6_Spd E1      | A6_Spd E2      |
|--------------------------|----------------------|----------------|----------------|----------------|----------------|----------------|----------------|
|                          | nmol/min/mg          | nmol/min/mg    | nmol/min/mg    | nmol/min/mg    | nmol/min/mg    | nmol/min/mg    | nmol/min/mg    |
| Michaelis-Menten         |                      |                |                |                | E1             | E2             | E1             |
| Best-fit values          |                      |                |                |                |                |                |                |
| V <sub>max</sub>         | 1438                 | 345.8          | 56.29          | 550.5          | 76.72          | 318.1          | 450.0          |
| K <sub>m</sub>           | 122.5                | 533.9          | 642.8          | 24.87          | 17.86          | 32.06          | 107.2          |
| Std. Error               |                      |                |                |                |                |                |                |
| V <sub>max</sub>         | 78.14                | 7.799          | 1.627          | 13.54          | 1.878          | 5.977          | 7.656          |
| K <sub>m</sub>           | 18.36                | 35.89          | 52.36          | 3.075          | 2.595          | 2.710          | 5.632          |
| 95% Confidence Intervals |                      |                |                |                |                |                |                |
| V <sub>max</sub>         | 1264 to 1612         | 329.5 to 362.2 | 52.88 to 59.69 | 521.1 to 580.0 | 72.63 to 80.81 | 305.1 to 331.1 | 433.3 to 466.6 |
| K <sub>m</sub>           | 81.60 to 163.4       | 458.8 to 609.0 | 533.2 to 752.4 | 18.17 to 31.57 | 12.20 to 23.51 | 26.16 to 37.97 | 94.89 to 119.4 |
| Goodness of Fit          |                      |                |                |                |                |                |                |
| Degrees of Freedom       | 10                   | 19             | 19             | 12             | 12             | 12             | 12             |
| R square                 | 0.9404               | 0.9846         | 0.9804         | 0.9191         | 0.8833         | 0.9647         | 0.9933         |
| Absolute Sum of Squares  | 56423                | 2276           | 81.23          | 8893           | 192.4          | 1562           | 1205           |
| Sy.x                     | 75.12                | 10.95          | 2.068          | 27.22          | 4.004          | 11.41          | 10.02          |
| Constraints              |                      |                |                |                |                |                |                |
| K <sub>m</sub>           | Km > 0,0             | Km > 0,0       | Km > 0,0       | Km > 0,0       | Km > 0,0       | Km > 0,0       | Km > 0,0       |
| Number of points         |                      |                |                |                |                |                |                |
| Analyzed                 | 12                   | 21             | 21             | 14             | 14             | 14             | 14             |

| GraphPad Prism 5.03      | A16_Spd E1     | A16_Spd E2     | A13_Spd E1     | A13_Spd E2     | A12_Spd E1     | A12_Spd E2     | A18_Spd E1     | A18_Spd E2     |
|--------------------------|----------------|----------------|----------------|----------------|----------------|----------------|----------------|----------------|
|                          | nmol/min/mg    | nmol/min/mg    | nmol/min/mg    | nmol/min/mg    | nmol/min/mg    | nmol/min/mg    | nmol/min/mg    | nmol/min/mg    |
| Michaelis-Menten         | E2             |                |                | E1             | E2             | E1             | E2             |                |
| Best-fit values          |                |                |                |                |                |                |                |                |
| V <sub>max</sub>         | 112.9          | 26.35          | 7527           | 198.6          | 5562           | 489.6          | 495.2          | 492.9          |
| K <sub>m</sub>           | 1.317          | 41.54          | 138.9          | 46.79          | 138.0          | 95.59          | 25.38          | 54.86          |
| Std. Error               |                |                |                |                |                |                |                |                |
| V <sub>max</sub>         | 1.894          | 1.490          | 171.8          | 9.048          | 105.8          | 11.4           | 10.63          | 10.19          |
| K <sub>m</sub>           | 0.9901         | 9.555          | 9.217          | 6.131          | 7.645          | 7.065          | 2.419          | 3.630          |
| 95% Confidence Intervals |                |                |                |                |                |                |                |                |
| V <sub>max</sub>         | 108.8 to 117.0 | 23.10 to 29.60 | 7167 to 7887   | 179.1 to 218.2 | 5341 to 5783   | 465.8 to 513.5 | 472.7 to 517.8 | 471.3 to 514.5 |
| K <sub>m</sub>           | 0.0 to 3.475   | 20.72 to 62.36 | 119.6 to 158.1 | 33.55 to 60.03 | 122.0 to 154.0 | 80.80 to 110.4 | 20.25 to 30.51 | 47.16 to 62.55 |
| Goodness of Fit          |                |                |                |                |                |                |                |                |
| Degrees of Freedom       | 12             | 12             | 19             | 13             | 19             | 19             | 16             | 16             |
| R square                 | 0.1380         | 0.7713         | 0.9860         | 0.9309         | 0.9899         | 0.9772         | 0.9374         | 0.9797         |
| Absolute Sum of Squares  | 285.7          | 86.03          | 1.120e+006     | 1075           | 427845         | 6996           | 6620           | 3649           |
| Sy.x                     | 4.879          | 2.677          | 242.8          | 9.094          | 150.1          | 19.19          | 20.34          | 15.10          |
| Constraints              |                |                |                |                |                |                |                |                |
| K <sub>m</sub>           | Km > 0,0       | Km > 0,0       | Km > 0,0       | Km > 0,0       | Km > 0,0       | Km > 0,0       | Km > 0,0       | Km > 0,0       |
| Number of points         |                |                |                |                |                |                |                |                |
| Analyzed                 | 14             | 14             | 21             | 15             | 21             | 21             | 18             | 18             |

| GraphPad Prism 5.03      | PL_Spd E1      | A4_Spd E1      | A4_Spd E2      | A3_Spd E1      | A3_Spd E2      | A7_Spd E1      | A7_Spd E2      | A11_Spd E1     | A11_Spd E2     |
|--------------------------|----------------|----------------|----------------|----------------|----------------|----------------|----------------|----------------|----------------|
|                          | nmol/min/mg    | nmol/min/mg    | nmol/min/mg    | nmol/min/mg    | nmol/min/mg    | nmol/min/mg    | nmol/min/mg    | nmol/min/mg    | nmol/min/mg    |
| Michaelis-Menten         |                |                |                |                | E1             | E2             | E1             | E2             |                |
| Best-fit values          |                |                |                |                |                |                |                |                |                |
| V <sub>max</sub>         | 1148           | 136.3          | 226.3          | 1422           | 438.5          | 1062           | 29.53          | 380.9          | 52.45          |
| K <sub>m</sub>           | 32.75          | ~ 1.284e-016   | 216.6          | 184.7          | 295.7          | 16.08          | ~ 1.883e-016   | 5.338          | 4.719          |
| Std. Error               |                |                |                |                |                |                |                |                |                |
| V <sub>max</sub>         | 29.82          | 4.365          | 3.984          | 44.78          | 9.985          | 41.33          | 1.964          | 5.627          | 0.8756         |
| K <sub>m</sub>           | 3.352          |                | 9.974          | 15.82          | 16.23          | 3.137          |                | 0.8642         | 0.8453         |
| 95% Confidence Intervals |                |                |                |                |                |                |                |                |                |
| V <sub>max</sub>         | 1084 to 1211   | 127.2 to 145.5 | 218.0 to 234.7 | 1328 to 1515   | 417.6 to 459.4 | 972.5 to 1151  | 25.16 to 33.91 | 368.7 to 393.0 | 50.50 to 54.40 |
| K <sub>m</sub>           | 25.65 to 39.86 |                | 195.8 to 237.5 | 151.6 to 217.8 | 261.7 to 329.7 | 9.307 to 22.86 |                | 3.471 to 7.205 | 2.836 to 6.603 |
| Goodness of Fit          |                |                |                |                |                |                |                |                |                |
| Degrees of Freedom       | 16             | 19             | 19             | 19             | 19             | 13             | 10             | 13             | 10             |
| R square                 | 0.9349         | -4.441e-016    | 0.9946         | 0.9780         | 0.9940         | 0.8107         | -4.441e-016    | 0.7998         | 0.8047         |
| Absolute Sum of Squares  | 44961          | 3746           | 349.7          | 54639          | 1370           | 54501          | 110.0          | 1586           | 15.59          |
| Sy.x                     | 53.01          | 14.04          | 4.290          | 53.63          | 8.491          | 64.75          | 3.317          | 11.04          | 1.249          |
| Constraints              |                |                |                |                |                |                |                |                |                |
| K <sub>m</sub>           | Km > 0,0       | Km > 0,0       | Km > 0,0       | Km > 0,0       | Km > 0,0       | Km > 0,0       | Km > 0,0       | Km > 0,0       | Km > 0,0       |
| Number of points         |                |                |                |                |                |                |                |                |                |
| Analyzed                 | 18             | 21             | 21             | 21             | 21             | 15             | 12             | 15             | 12             |

## Inhibition of SMO by covalently modified (*R*)-MeSpd (*S*)-MeSpd derivatives

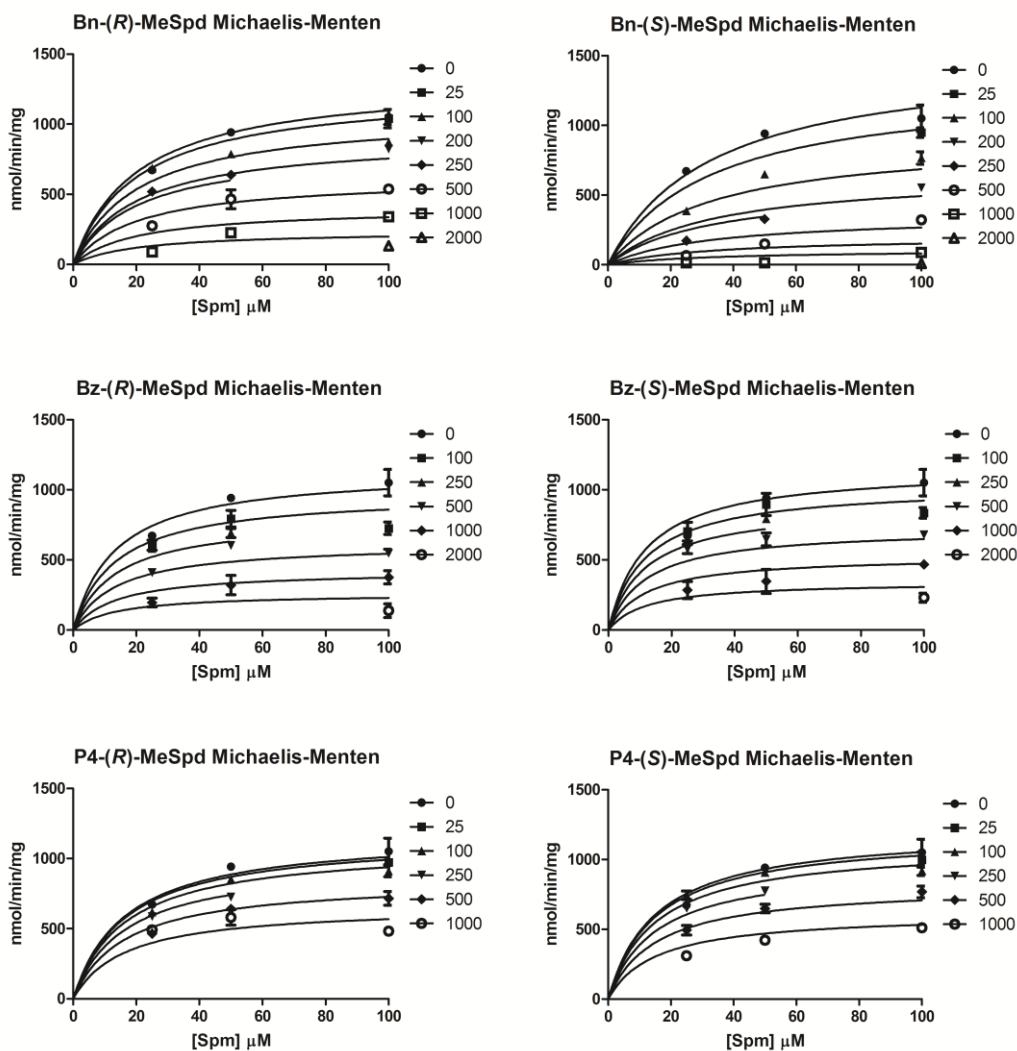

| GraphPad Prism 5.03       | Global (shared)       | Global (shared)       | Global (shared)       | Global (shared)       | Global (shared)       | Global (shared)       |
|---------------------------|-----------------------|-----------------------|-----------------------|-----------------------|-----------------------|-----------------------|
| Noncompetitive inhibition | Bn-( <i>R</i> )-MeSpd | Bn-( <i>S</i> )-MeSpd | Bz-( <i>R</i> )-MeSpd | Bz-( <i>S</i> )-MeSpd | P4-( <i>R</i> )-MeSpd | P4-( <i>S</i> )-MeSpd |
| Best-fit values           |                       |                       |                       |                       |                       |                       |
| $V_{max}$                 | 1320                  | 1502                  | 1141                  | 1154                  | 1178                  | 1215                  |
| $I$                       |                       |                       |                       |                       |                       |                       |
| $K_i$                     | 440.8                 | 155                   | 589                   | 846                   | 1277                  | 1016                  |
| $K_m$                     | 20.26                 | 32.94                 | 13.41                 | 11.79                 | 16.45                 | 15.21                 |
| Std. Error                |                       |                       |                       |                       |                       |                       |
| $V_{max}$                 | 50.8                  | 89.27                 | 57.86                 | 53.07                 | 36.78                 | 36.77                 |
| $K_i$                     | 32.26                 | 12.61                 | 56.77                 | 81.95                 | 110.7                 | 79.12                 |
| $K_m$                     | 2.792                 | 5.471                 | 2.831                 | 2.422                 | 2.009                 | 1.900                 |
| 95% Confidence Intervals  |                       |                       |                       |                       |                       |                       |
| $V_{max}$                 | 1218 to 1422          | 1322 to 1681          | 1024 to 1258          | 1047 to 1261          | 1104 to 1252          | 1140 to 1289          |
| $K_i$                     | 375.9 to 505.7        | 129.6 to 180.3        | 474.4 to 703.6        | 680.6 to 1011         | 1054 to 1500          | 856.4 to 1176         |
| $K_m$                     | 14.65 to 25.88        | 21.93 to 43.95        | 7.695 to 19.13        | 6.904 to 16.68        | 12.40 to 20.51        | 11.38 to 19.05        |
| Goodness of Fit           |                       |                       |                       |                       |                       |                       |
| Degrees of Freedom        | 48                    | 48                    | 42                    | 42                    | 42                    | 42                    |
| R square                  | 0.9526                | 0.9594                | 0.907                 | 0.893                 | 0.9071                | 0.9299                |
| Absolute Sum of Squares   | 216629                | 255707                | 264780                | 267496                | 144692                | 146945                |
| Sy.x                      | 67.18                 | 72.99                 | 79.4                  | 79.81                 | 58.69                 | 59.15                 |

## Bn-(R)-MeSpd

| Nonlin fit |                           | A              | B              | C              | D              | E              | F              | G              | H              | I               |
|------------|---------------------------|----------------|----------------|----------------|----------------|----------------|----------------|----------------|----------------|-----------------|
|            |                           | 0              | 25             | 100            | 200            | 250            | 500            | 1000           | 2000           | Global (shared) |
|            |                           | Y              | Y              | Y              | Y              | Y              | Y              | Y              | Y              | Y               |
| 1          | Noncompetitive inhibition |                |                |                |                |                |                |                |                |                 |
| 2          | Best-fit values           |                |                |                |                |                |                |                |                |                 |
| 3          | Vmax                      | 1320           | 1320           | 1320           | 1320           | 1320           | 1320           | 1320           | 1320           | 1320            |
| 4          | I                         | = 0.0          | = 25.00        | = 100.0        | = 200.0        | = 250.0        | = 500.0        | = 1000         | = 2000         |                 |
| 5          | Ki                        | 440.8          | 440.8          | 440.8          | 440.8          | 440.8          | 440.8          | 440.8          | 440.8          | 440.8           |
| 6          | KM                        | 20.26          | 20.26          | 20.26          | 20.26          | 20.26          | 20.26          | 20.26          | 20.26          | 20.26           |
| 7          | Std. Error                |                |                |                |                |                |                |                |                |                 |
| 8          | Vmax                      | 50.80          | 50.80          | 50.80          | 50.80          | 50.80          | 50.80          | 50.80          | 50.80          | 50.80           |
| 9          | Ki                        | 32.26          | 32.26          | 32.26          | 32.26          | 32.26          | 32.26          | 32.26          | 32.26          | 32.26           |
| 10         | KM                        | 2.792          | 2.792          | 2.792          | 2.792          | 2.792          | 2.792          | 2.792          | 2.792          | 2.792           |
| 11         | 95% Confidence Intervals  |                |                |                |                |                |                |                |                |                 |
| 12         | Vmax                      | 1218 to 1422   | 1218 to 1422   | 1218 to 1422   | 1218 to 1422   | 1218 to 1422   | 1218 to 1422   | 1218 to 1422   | 1218 to 1422   | 1218 to 1422    |
| 13         | Ki                        | 375.9 to 505.7 | 375.9 to 505.7 | 375.9 to 505.7 | 375.9 to 505.7 | 375.9 to 505.7 | 375.9 to 505.7 | 375.9 to 505.7 | 375.9 to 505.7 | 375.9 to 505.7  |
| 14         | KM                        | 14.65 to 25.88 | 14.65 to 25.88 | 14.65 to 25.88 | 14.65 to 25.88 | 14.65 to 25.88 | 14.65 to 25.88 | 14.65 to 25.88 | 14.65 to 25.88 | 14.65 to 25.88  |
| 15         | Goodness of Fit           |                |                |                |                |                |                |                |                |                 |
| 16         | Degrees of Freedom        |                |                |                |                |                |                |                |                | 48              |
| 17         | R square                  | 0.8583         | -0.0001727     | 0.4070         | -2020          | 0.3498         | 0.7719         | 0.3007         | -11.20         | 0.9526          |
| 18         | Absolute Sum of Squares   | 34954          | 8473           | 33931          | 13719          | 15526          | 27868          | 67744          | 14415          | 216629          |
| 19         | Sy.x                      |                |                |                |                |                |                |                |                | 67.18           |
| 20         | Constraints               |                |                |                |                |                |                |                |                |                 |
| 21         | Vmax                      | Vmax is shared | Vmax is shared | Vmax is shared | Vmax is shared | Vmax is shared | Vmax is shared | Vmax is shared | Vmax is shared |                 |
| 22         | I                         | I = 0.0        | I = 25.00      | I = 100.0      | I = 200.0      | I = 250.0      | I = 500.0      | I = 1000       | I = 2000       |                 |
| 23         | Ki                        | Ki is shared   | Ki is shared   | Ki is shared   | Ki is shared   | Ki is shared   | Ki is shared   | Ki is shared   | Ki is shared   |                 |
| 24         | KM                        | KM is shared   | KM is shared   | KM is shared   | KM is shared   | KM is shared   | KM is shared   | KM is shared   | KM is shared   |                 |
| 25         | Number of points          |                |                |                |                |                |                |                |                |                 |
| 26         | Analyzed                  | 9              | 3              | 9              | 3              | 6              | 9              | 9              | 3              |                 |
| 27         |                           |                |                |                |                |                |                |                |                |                 |

## Bn-(S)-MeSpd

| Nonlin fit |                           | A              | B              | C              | D              | E              | F              | G              | H              | I               |
|------------|---------------------------|----------------|----------------|----------------|----------------|----------------|----------------|----------------|----------------|-----------------|
|            |                           | 0              | 25             | 100            | 200            | 250            | 500            | 1000           | 2000           | Global (shared) |
|            |                           | Y              | Y              | Y              | Y              | Y              | Y              | Y              | Y              | Y               |
| 1          | Noncompetitive inhibition |                |                |                |                |                |                |                |                |                 |
| 2          | Best-fit values           |                |                |                |                |                |                |                |                |                 |
| 3          | Vmax                      | 1502           | 1502           | 1502           | 1502           | 1502           | 1502           | 1502           | 1502           | 1502            |
| 4          | I                         | = 0.0          | = 25.00        | = 100.0        | = 200.0        | = 250.0        | = 500.0        | = 1000         | = 2000         |                 |
| 5          | Ki                        | 155.0          | 155.0          | 155.0          | 155.0          | 155.0          | 155.0          | 155.0          | 155.0          | 155.0           |
| 6          | KM                        | 32.94          | 32.94          | 32.94          | 32.94          | 32.94          | 32.94          | 32.94          | 32.94          | 32.94           |
| 7          | Std. Error                |                |                |                |                |                |                |                |                |                 |
| 8          | Vmax                      | 89.27          | 89.27          | 89.27          | 89.27          | 89.27          | 89.27          | 89.27          | 89.27          | 89.27           |
| 9          | Ki                        | 12.61          | 12.61          | 12.61          | 12.61          | 12.61          | 12.61          | 12.61          | 12.61          | 12.61           |
| 10         | KM                        | 5.471          | 5.471          | 5.471          | 5.471          | 5.471          | 5.471          | 5.471          | 5.471          | 5.471           |
| 11         | 95% Confidence Intervals  |                |                |                |                |                |                |                |                |                 |
| 12         | Vmax                      | 1322 to 1681   | 1322 to 1681   | 1322 to 1681   | 1322 to 1681   | 1322 to 1681   | 1322 to 1681   | 1322 to 1681   | 1322 to 1681   | 1322 to 1681    |
| 13         | Ki                        | 129.6 to 180.3 | 129.6 to 180.3 | 129.6 to 180.3 | 129.6 to 180.3 | 129.6 to 180.3 | 129.6 to 180.3 | 129.6 to 180.3 | 129.6 to 180.3 | 129.6 to 180.3  |
| 14         | KM                        | 21.93 to 43.95 | 21.93 to 43.95 | 21.93 to 43.95 | 21.93 to 43.95 | 21.93 to 43.95 | 21.93 to 43.95 | 21.93 to 43.95 | 21.93 to 43.95 | 21.93 to 43.95  |
| 15         | Goodness of Fit           |                |                |                |                |                |                |                |                |                 |
| 16         | Degrees of Freedom        |                |                |                |                |                |                |                |                | 48              |
| 17         | R square                  | 0.8261         | -0.8254        | 0.7670         | -24.79         | 0.5074         | 0.5576         | -4.464         | -34.94         | 0.9594          |
| 18         | Absolute Sum of Squares   | 42894          | 4079           | 54084          | 11245          | 17851          | 45885          | 63940          | 15729          | 255707          |
| 19         | Sy.x                      |                |                |                |                |                |                |                |                | 72.99           |
| 20         | Constraints               |                |                |                |                |                |                |                |                |                 |
| 21         | Vmax                      | Vmax is shared | Vmax is shared | Vmax is shared | Vmax is shared | Vmax is shared | Vmax is shared | Vmax is shared | Vmax is shared |                 |
| 22         | I                         | I = 0.0        | I = 25.00      | I = 100.0      | I = 200.0      | I = 250.0      | I = 500.0      | I = 1000       | I = 2000       |                 |
| 23         | Ki                        | Ki is shared   | Ki is shared   | Ki is shared   | Ki is shared   | Ki is shared   | Ki is shared   | Ki is shared   | Ki is shared   |                 |
| 24         | KM                        | KM is shared   | KM is shared   | KM is shared   | KM is shared   | KM is shared   | KM is shared   | KM is shared   | KM is shared   |                 |
| 25         | Number of points          |                |                |                |                |                |                |                |                |                 |
| 26         | Analyzed                  | 9              | 3              | 9              | 3              | 6              | 9              | 9              | 3              |                 |
| 27         |                           |                |                |                |                |                |                |                |                |                 |

### Bz-(R)-MeSpd

| Nonlin fit |                           | A              | B              | C              | D              | E              | F              | G               |
|------------|---------------------------|----------------|----------------|----------------|----------------|----------------|----------------|-----------------|
|            |                           | 0              | 100            | 250            | 500            | 1000           | 2000           | Global (shared) |
|            |                           | Y              | Y              | Y              | Y              | Y              | Y              | Y               |
| 1          | Noncompetitive inhibition |                |                |                |                |                |                |                 |
| 2          | Best-fit values           |                |                |                |                |                |                |                 |
| 3          | Vmax                      | 1141           | 1141           | 1141           | 1141           | 1141           | 1141           | 1141            |
| 4          | I                         | = 0.0          | = 100.0        | = 250.0        | = 500.0        | = 1000         | = 2000         |                 |
| 5          | Ki                        | 589.0          | 589.0          | 589.0          | 589.0          | 589.0          | 589.0          | 589.0           |
| 6          | KM                        | 13.41          | 13.41          | 13.41          | 13.41          | 13.41          | 13.41          | 13.41           |
| 7          | Std. Error                |                |                |                |                |                |                |                 |
| 8          | Vmax                      | 57.86          | 57.86          | 57.86          | 57.86          | 57.86          | 57.86          | 57.86           |
| 9          | Ki                        | 56.77          | 56.77          | 56.77          | 56.77          | 56.77          | 56.77          | 56.77           |
| 10         | KM                        | 2.831          | 2.831          | 2.831          | 2.831          | 2.831          | 2.831          | 2.831           |
| 11         | 95% Confidence Intervals  |                |                |                |                |                |                |                 |
| 12         | Vmax                      | 1024 to 1258   | 1024 to 1258   | 1024 to 1258   | 1024 to 1258   | 1024 to 1258   | 1024 to 1258   | 1024 to 1258    |
| 13         | Ki                        | 474.4 to 703.6 | 474.4 to 703.6 | 474.4 to 703.6 | 474.4 to 703.6 | 474.4 to 703.6 | 474.4 to 703.6 | 474.4 to 703.6  |
| 14         | KM                        | 7.695 to 19.13 | 7.695 to 19.13 | 7.695 to 19.13 | 7.695 to 19.13 | 7.695 to 19.13 | 7.695 to 19.13 | 7.695 to 19.13  |
| 15         | Goodness of Fit           |                |                |                |                |                |                |                 |
| 16         | Degrees of Freedom        |                |                |                |                |                |                | 42              |
| 17         | R square                  | 0.8183         | -0.04134       | -0.09510       | 0.2597         | 0.4697         | -5.174         | 0.9070          |
| 18         | Absolute Sum of Squares   | 44813          | 71881          | 28650          | 54106          | 35553          | 29777          | 264780          |
| 19         | Sy.x                      |                |                |                |                |                |                | 79.40           |
| 20         | Constraints               |                |                |                |                |                |                |                 |
| 21         | Vmax                      | Vmax is shared | Vmax is shared | Vmax is shared | Vmax is shared | Vmax is shared | Vmax is shared |                 |
| 22         | I                         | I = 0.0        | I = 100.0      | I = 250.0      | I = 500.0      | I = 1000       | I = 2000       |                 |
| 23         | Ki                        | Ki is shared   | Ki is shared   | Ki is shared   | Ki is shared   | Ki is shared   | Ki is shared   |                 |
| 24         | KM                        | KM is shared   | KM is shared   | KM is shared   | KM is shared   | KM is shared   | KM is shared   |                 |
| 25         | Number of points          |                |                |                |                |                |                |                 |
| 26         | Analyzed                  | 9              | 9              | 6              | 9              | 9              | 3              |                 |
| 27         |                           |                |                |                |                |                |                |                 |

### Bz-(S)-MeSpd

| Nonlin fit |                           | A              | B              | C              | D              | E              | F              | G               |
|------------|---------------------------|----------------|----------------|----------------|----------------|----------------|----------------|-----------------|
|            |                           | 0              | 100            | 250            | 500            | 1000           | 2000           | Global (shared) |
|            |                           | Y              | Y              | Y              | Y              | Y              | Y              | Y               |
| 1          | Noncompetitive inhibition |                |                |                |                |                |                |                 |
| 2          | Best-fit values           |                |                |                |                |                |                |                 |
| 3          | Vmax                      | 1154           | 1154           | 1154           | 1154           | 1154           | 1154           | 1154            |
| 4          | I                         | = 0.0          | = 100.0        | = 250.0        | = 500.0        | = 1000         | = 2000         |                 |
| 5          | Ki                        | 846.0          | 846.0          | 846.0          | 846.0          | 846.0          | 846.0          | 846.0           |
| 6          | KM                        | 11.79          | 11.79          | 11.79          | 11.79          | 11.79          | 11.79          | 11.79           |
| 7          | Std. Error                |                |                |                |                |                |                |                 |
| 8          | Vmax                      | 53.07          | 53.07          | 53.07          | 53.07          | 53.07          | 53.07          | 53.07           |
| 9          | Ki                        | 81.95          | 81.95          | 81.95          | 81.95          | 81.95          | 81.95          | 81.95           |
| 10         | KM                        | 2.422          | 2.422          | 2.422          | 2.422          | 2.422          | 2.422          | 2.422           |
| 11         | 95% Confidence Intervals  |                |                |                |                |                |                |                 |
| 12         | Vmax                      | 1047 to 1261   | 1047 to 1261   | 1047 to 1261   | 1047 to 1261   | 1047 to 1261   | 1047 to 1261   | 1047 to 1261    |
| 13         | Ki                        | 680.6 to 1011  | 680.6 to 1011  | 680.6 to 1011  | 680.6 to 1011  | 680.6 to 1011  | 680.6 to 1011  | 680.6 to 1011   |
| 14         | KM                        | 6.904 to 16.68 | 6.904 to 16.68 | 6.904 to 16.68 | 6.904 to 16.68 | 6.904 to 16.68 | 6.904 to 16.68 | 6.904 to 16.68  |
| 15         | Goodness of Fit           |                |                |                |                |                |                |                 |
| 16         | Degrees of Freedom        |                |                |                |                |                |                | 42              |
| 17         | R square                  | 0.7674         | 0.2974         | 0.2307         | -0.8618        | 0.2090         | -8.157         | 0.8930          |
| 18         | Absolute Sum of Squares   | 57371          | 58628          | 30219          | 42190          | 59332          | 19757          | 267496          |
| 19         | Sy.x                      |                |                |                |                |                |                | 79.81           |
| 20         | Constraints               |                |                |                |                |                |                |                 |
| 21         | Vmax                      | Vmax is shared | Vmax is shared | Vmax is shared | Vmax is shared | Vmax is shared | Vmax is shared |                 |
| 22         | I                         | I = 0.0        | I = 100.0      | I = 250.0      | I = 500.0      | I = 1000       | I = 2000       |                 |
| 23         | Ki                        | Ki is shared   | Ki is shared   | Ki is shared   | Ki is shared   | Ki is shared   | Ki is shared   |                 |
| 24         | KM                        | KM is shared   | KM is shared   | KM is shared   | KM is shared   | KM is shared   | KM is shared   |                 |
| 25         | Number of points          |                |                |                |                |                |                |                 |
| 26         | Analyzed                  | 9              | 9              | 6              | 9              | 9              | 3              |                 |
| 27         |                           |                |                |                |                |                |                |                 |

### P4-(R)-MeSpd

| Nonlin fit |                           | A              | B              | C              | D              | E              | F              | G               |
|------------|---------------------------|----------------|----------------|----------------|----------------|----------------|----------------|-----------------|
|            |                           | 0              | 25             | 100            | 250            | 500            | 1000           | Global (shared) |
|            |                           | Y              | Y              | Y              | Y              | Y              | Y              | Y               |
| 1          | Noncompetitive inhibition |                |                |                |                |                |                |                 |
| 2          | Best-fit values           |                |                |                |                |                |                |                 |
| 3          | Vmax                      | 1178           | 1178           | 1178           | 1178           | 1178           | 1178           | 1178            |
| 4          | I                         | = 0.0          | = 25.00        | = 100.0        | = 250.0        | = 500.0        | = 1000         |                 |
| 5          | Ki                        | 1277           | 1277           | 1277           | 1277           | 1277           | 1277           | 1277            |
| 6          | KM                        | 16.45          | 16.45          | 16.45          | 16.45          | 16.45          | 16.45          | 16.45           |
| 7          | Std. Error                |                |                |                |                |                |                |                 |
| 8          | Vmax                      | 36.78          | 36.78          | 36.78          | 36.78          | 36.78          | 36.78          | 36.78           |
| 9          | Ki                        | 110.7          | 110.7          | 110.7          | 110.7          | 110.7          | 110.7          | 110.7           |
| 10         | KM                        | 2.009          | 2.009          | 2.009          | 2.009          | 2.009          | 2.009          | 2.009           |
| 11         | 95% Confidence Intervals  |                |                |                |                |                |                |                 |
| 12         | Vmax                      | 1104 to 1252   | 1104 to 1252   | 1104 to 1252   | 1104 to 1252   | 1104 to 1252   | 1104 to 1252   | 1104 to 1252    |
| 13         | Ki                        | 1054 to 1500   | 1054 to 1500   | 1054 to 1500   | 1054 to 1500   | 1054 to 1500   | 1054 to 1500   | 1054 to 1500    |
| 14         | KM                        | 12.40 to 20.51 | 12.40 to 20.51 | 12.40 to 20.51 | 12.40 to 20.51 | 12.40 to 20.51 | 12.40 to 20.51 | 12.40 to 20.51  |
| 15         | Goodness of Fit           |                |                |                |                |                |                |                 |
| 16         | Degrees of Freedom        |                |                |                |                |                |                | 42              |
| 17         | R square                  | 0.8510         | -2.724         | 0.9022         | 0.9217         | 0.8771         | -1.985         | 0.9071          |
| 18         | Absolute Sum of Squares   | 36753          | 1510           | 14388          | 2362           | 13046          | 76633          | 144692          |
| 19         | Sy.x                      |                |                |                |                |                |                | 58.69           |
| 20         | Constraints               |                |                |                |                |                |                |                 |
| 21         | Vmax                      | Vmax is shared | Vmax is shared | Vmax is shared | Vmax is shared | Vmax is shared | Vmax is shared |                 |
| 22         | I                         | I = 0.0        | I = 25.00      | I = 100.0      | I = 250.0      | I = 500.0      | I = 1000       |                 |
| 23         | Ki                        | Ki is shared   | Ki is shared   | Ki is shared   | Ki is shared   | Ki is shared   | Ki is shared   |                 |
| 24         | KM                        | KM is shared   | KM is shared   | KM is shared   | KM is shared   | KM is shared   | KM is shared   |                 |
| 25         | Number of points          |                |                |                |                |                |                |                 |
| 26         | Analyzed                  | 9              | 3              | 9              | 6              | 9              | 9              |                 |
| 27         |                           |                |                |                |                |                |                |                 |
| 28         |                           |                |                |                |                |                |                |                 |

### P4-(S)-MeSpd

| Nonlin fit |                           | A              | B              | C              | D              | E              | F              | G               |
|------------|---------------------------|----------------|----------------|----------------|----------------|----------------|----------------|-----------------|
|            |                           | 0              | 25             | 100            | 250            | 500            | 1000           | Global (shared) |
|            |                           | Y              | Y              | Y              | Y              | Y              | Y              | Y               |
| 1          | Noncompetitive inhibition |                |                |                |                |                |                |                 |
| 2          | Best-fit values           |                |                |                |                |                |                |                 |
| 3          | Vmax                      | 1215           | 1215           | 1215           | 1215           | 1215           | 1215           | 1215            |
| 4          | I                         | = 0.0          | = 25.00        | = 100.0        | = 250.0        | = 500.0        | = 1000         |                 |
| 5          | Ki                        | 1016           | 1016           | 1016           | 1016           | 1016           | 1016           | 1016            |
| 6          | KM                        | 15.21          | 15.21          | 15.21          | 15.21          | 15.21          | 15.21          | 15.21           |
| 7          | Std. Error                |                |                |                |                |                |                |                 |
| 8          | Vmax                      | 36.77          | 36.77          | 36.77          | 36.77          | 36.77          | 36.77          | 36.77           |
| 9          | Ki                        | 79.12          | 79.12          | 79.12          | 79.12          | 79.12          | 79.12          | 79.12           |
| 10         | KM                        | 1.900          | 1.900          | 1.900          | 1.900          | 1.900          | 1.900          | 1.900           |
| 11         | 95% Confidence Intervals  |                |                |                |                |                |                |                 |
| 12         | Vmax                      | 1140 to 1289   | 1140 to 1289   | 1140 to 1289   | 1140 to 1289   | 1140 to 1289   | 1140 to 1289   | 1140 to 1289    |
| 13         | Ki                        | 856.4 to 1176  | 856.4 to 1176  | 856.4 to 1176  | 856.4 to 1176  | 856.4 to 1176  | 856.4 to 1176  | 856.4 to 1176   |
| 14         | KM                        | 11.38 to 19.05 | 11.38 to 19.05 | 11.38 to 19.05 | 11.38 to 19.05 | 11.38 to 19.05 | 11.38 to 19.05 | 11.38 to 19.05  |
| 15         | Goodness of Fit           |                |                |                |                |                |                |                 |
| 16         | Degrees of Freedom        |                |                |                |                |                |                | 42              |
| 17         | R square                  | 0.8394         | -0.4236        | 0.4561         | 0.5112         | 0.8237         | 0.5858         | 0.9299          |
| 18         | Absolute Sum of Squares   | 39617          | 8747           | 36964          | 14122          | 21386          | 26109          | 146945          |
| 19         | Sy.x                      |                |                |                |                |                |                | 59.15           |
| 20         | Constraints               |                |                |                |                |                |                |                 |
| 21         | Vmax                      | Vmax is shared | Vmax is shared | Vmax is shared | Vmax is shared | Vmax is shared | Vmax is shared |                 |
| 22         | I                         | I = 0.0        | I = 25.00      | I = 100.0      | I = 250.0      | I = 500.0      | I = 1000       |                 |
| 23         | Ki                        | Ki is shared   | Ki is shared   | Ki is shared   | Ki is shared   | Ki is shared   | Ki is shared   |                 |
| 24         | KM                        | KM is shared   | KM is shared   | KM is shared   | KM is shared   | KM is shared   | KM is shared   |                 |
| 25         | Number of points          |                |                |                |                |                |                |                 |
| 26         | Analyzed                  | 9              | 3              | 9              | 6              | 9              | 9              |                 |
| 27         |                           |                |                |                |                |                |                |                 |
| 28         |                           |                |                |                |                |                |                |                 |

## Michaelis-Menten Graphs and Data of **Supplementary Material 1** Tables 1 and 2

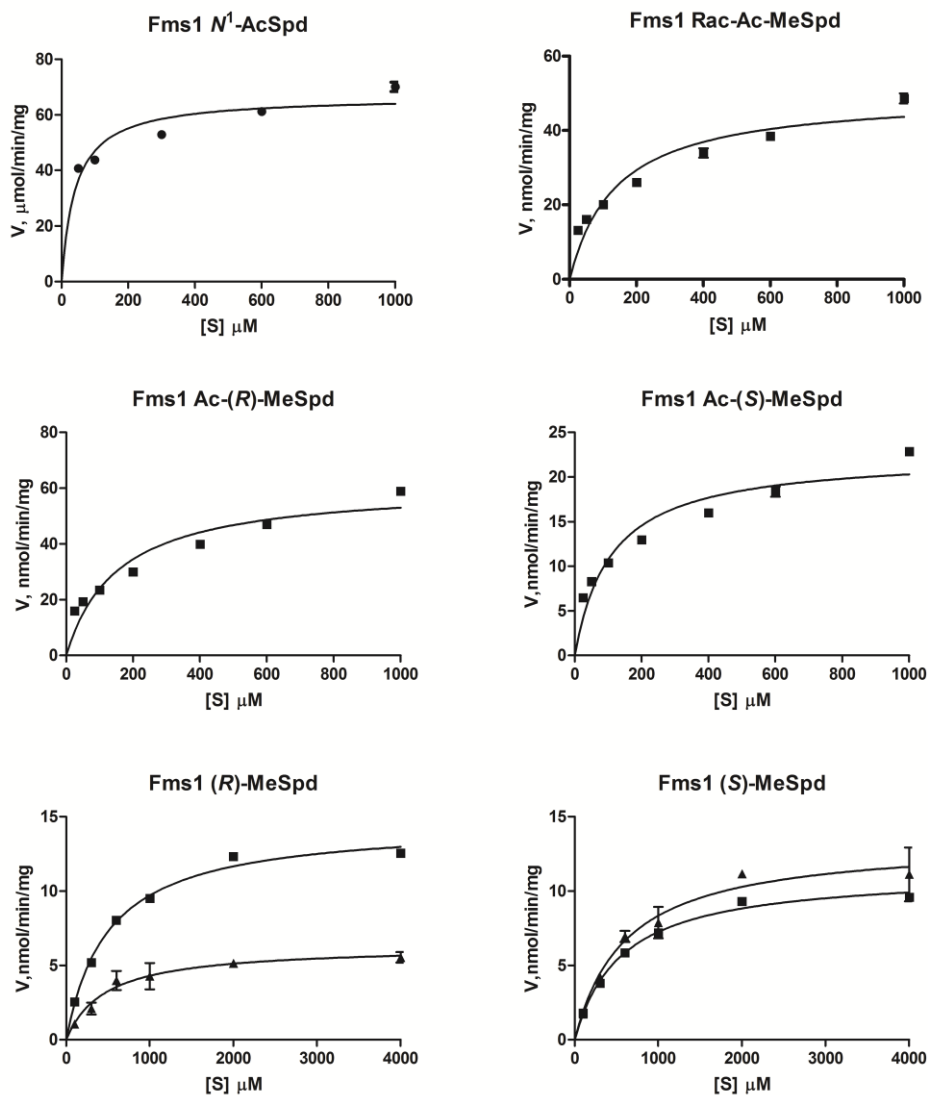

| GraphPad Prism 5.03      | <i>N</i> <sup>1</sup> AcSpd | Rac-AcMeSpd    | Ac-( <i>R</i> )-MeSpd | Ac-( <i>S</i> )-MeSpd | ( <i>R</i> )-MeSpd | ( <i>R</i> )-MeSpd | ( <i>S</i> )-MeSpd | ( <i>S</i> )-MeSpd |
|--------------------------|-----------------------------|----------------|-----------------------|-----------------------|--------------------|--------------------|--------------------|--------------------|
|                          | µmol/min/mg                 | nmol/min/mg    | nmol/min/mg           | nmol/min/mg           | nmol/min/mg        | nmol/min/mg        | nmol/min/mg        | nmol/min/mg        |
| Michaelis-Menten         |                             |                |                       |                       | E1                 | E2                 | E1                 | E2                 |
| Best-fit values          |                             |                |                       |                       |                    |                    |                    |                    |
| $V_{max}$                | 66.65                       | 49.78          | 61.24                 | 22.51                 | 14.59              | 6.315              | 11.28              | 13.40              |
| $K_m$                    | 41.78                       | 139.3          | 154.8                 | 109.2                 | 502.2              | 466.6              | 555.1              | 606.0              |
| Std. Error               |                             |                |                       |                       |                    |                    |                    |                    |
| $V_{max}$                | 2.294                       | 2.568          | 3.584                 | 1.054                 | 0.2778             | 0.3535             | 0.2146             | 0.7203             |
| $K_m$                    | 7.564                       | 23.43          | 28.59                 | 17.97                 | 31.11              | 87.16              | 33.19              | 99.42              |
| 95% Confidence Intervals |                             |                |                       |                       |                    |                    |                    |                    |
| $V_{max}$                | 61.69 to 71.60              | 44.41 to 55.15 | 53.74 to 68.74        | 20.31 to 24.72        | 14.00 to 15.18     | 5.565 to 7.064     | 10.83 to 11.74     | 11.87 to 14.92     |
| $K_m$                    | 25.44 to 58.12              | 90.22 to 188.3 | 94.97 to 214.6        | 71.63 to 146.8        | 436.2 to 568.1     | 281.8 to 651.4     | 484.7 to 625.4     | 395.3 to 816.8     |
| Goodness of Fit          |                             |                |                       |                       |                    |                    |                    |                    |
| Degrees of Freedom       | 13                          | 19             | 19                    | 19                    | 16                 | 16                 | 16                 | 16                 |
| R square                 | 0.8226                      | 0.9099         | 0.8962                | 0.9027                | 0.9898             | 0.9156             | 0.9909             | 0.9396             |
| Absolute Sum of Squares  | 316.5                       | 271.1          | 464.4                 | 59.74                 | 2.402              | 4.183              | 1.292              | 13.25              |
| Sy.x                     | 4.934                       | 3.778          | 4.944                 | 1.773                 | 0.3874             | 0.5113             | 0.2842             | 0.9099             |
| Constraints              |                             |                |                       |                       |                    |                    |                    |                    |
| $K_m$                    | Km > 0.0                    | Km > 0.0       | Km > 0.0              | Km > 0.0              | Km > 0.0           | Km > 0.0           | Km > 0.0           | Km > 0.0           |
| Number of points         |                             |                |                       |                       |                    |                    |                    |                    |
| Analyzed                 | 15                          | 21             | 21                    | 21                    | 18                 | 18                 | 18                 | 18                 |
